# Supplementary material for: Hydrogels bearing bioengineered mimetic embryonic microenvironments for tumor reversion
Source: Royal Society of Chemistry journal article supplement (doi:10.1039/c6tb00927a), 2016-01-01
Supplement: c6tb00927a1.pdf [file c6tb00927a1.pdf]

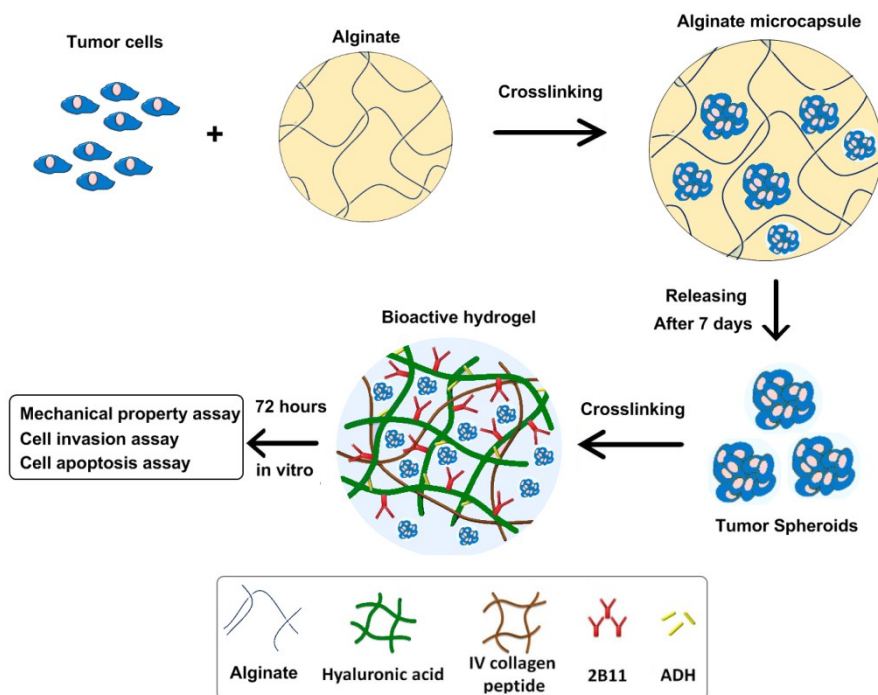

Supplementar

**y Figure 1** Schematic of reversing tumor phenotype in vitro 3D cancer model by means of bioactive hydrogels.

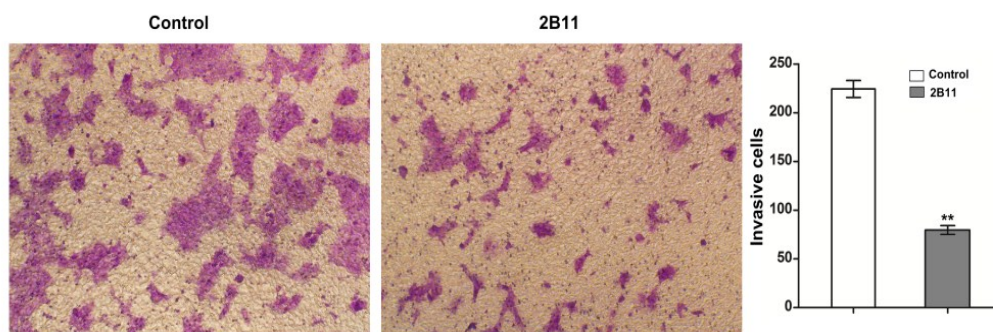

**Supplementary Figure 2** Invasive ability of BT474 cells released from the cell spheroids. \* $P < 0.05$ ; \*\* $P < 0.01$ .
